# Supplementary material for: Oncostatin M expression and TP53 mutation status regulate tumor-infiltration of immune cells and survival outcomes in cholangiocarcinoma
Source: publisher site journal article supplement (doi:10.18632/aging.103936), 2020-11-07
Supplement: Supplementary file [file aging-v12i21-103936-supplementary-material-SD1.pdf]

SUPPLEMENTARY FIGURES

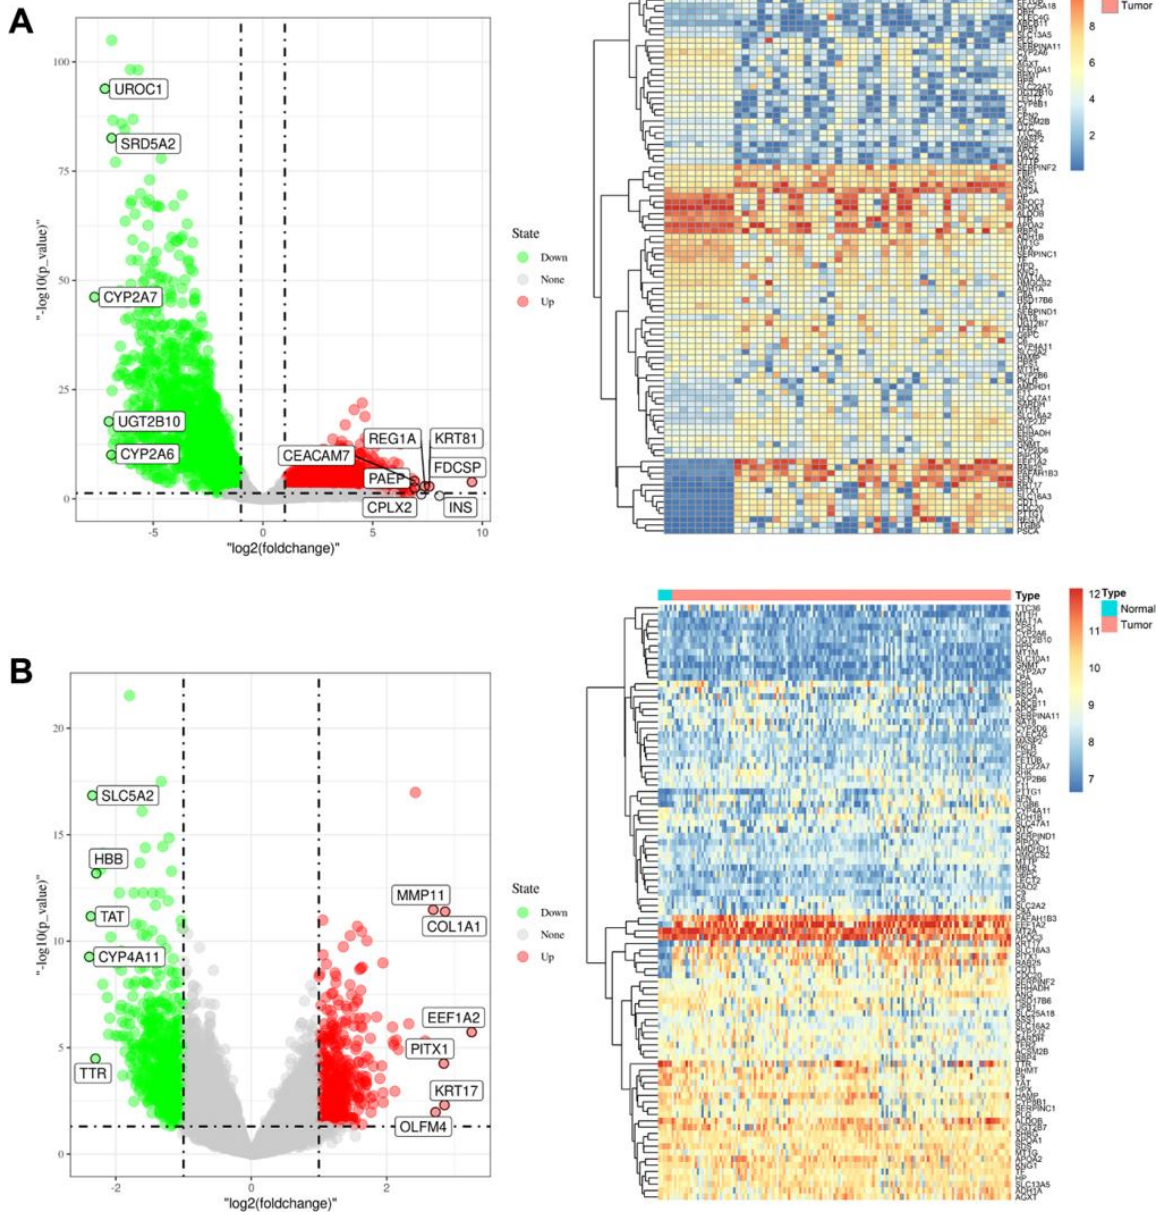

**Supplementary Figure 1.** (A) Volcano plot and heatmap of TCGA CCA and precancerous tissues. (B) Volcano plot and heatmap of GSE32225 CCA and precancerous tissues.

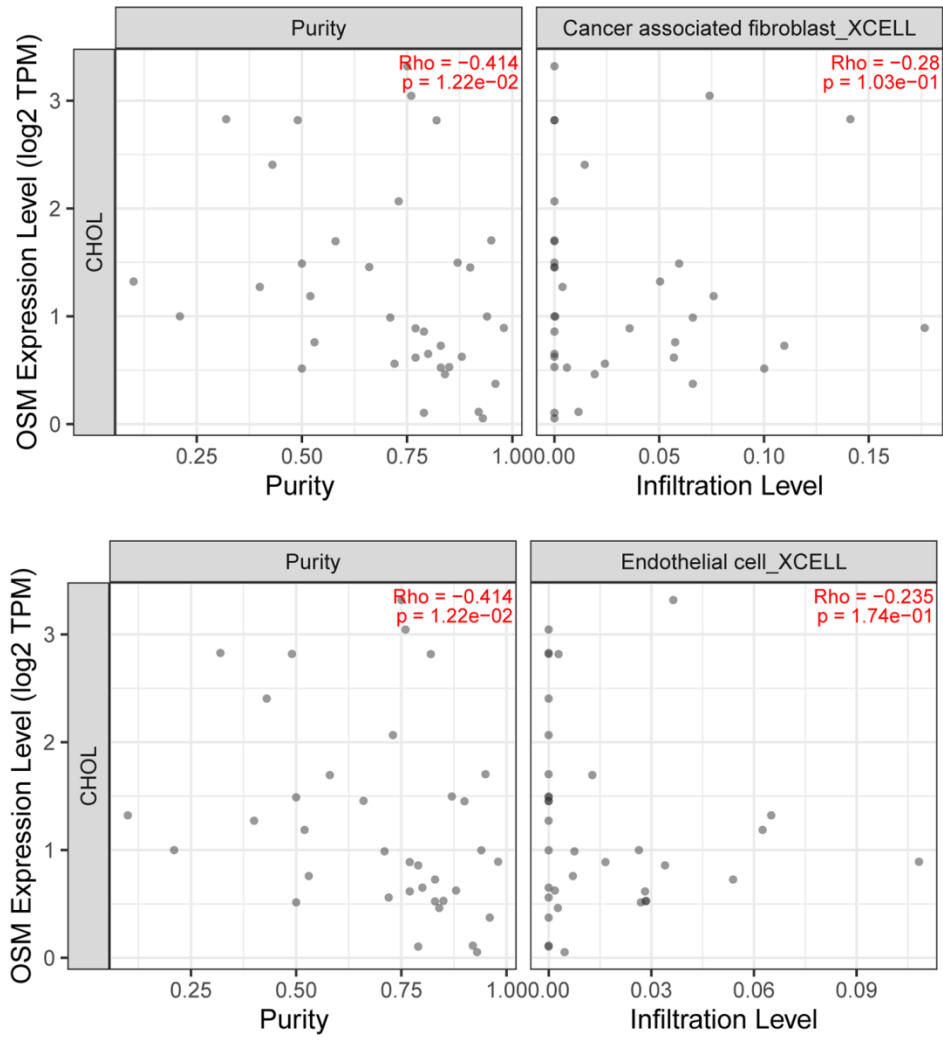

Supplementary Figure 2. Correlation between OSM expression and the proportion of cancer-associated fibroblasts and endothelial cells.
